# Supplementary material
Source: PubMed Central journal article supplement (PMC11083627)
Supplement: glad222_suppl_supplementary_figures_1_tables_1-2.pdf [file glad222_suppl_supplementary_figures_1_tables_1-2.pdf]

VDAC1/2

Stromal

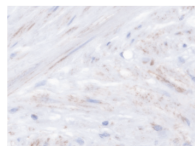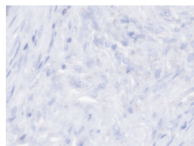

Epithelial

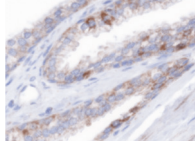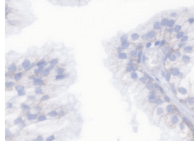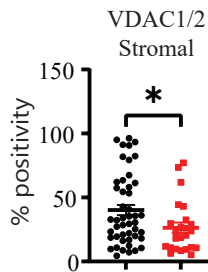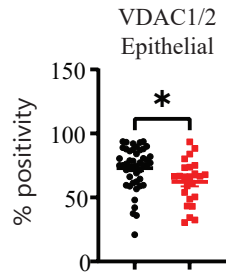

PINK1

Stromal

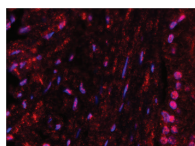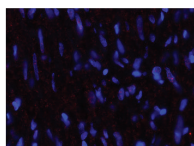

Epithelial

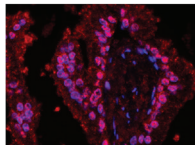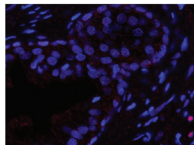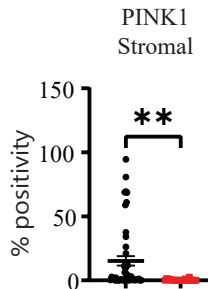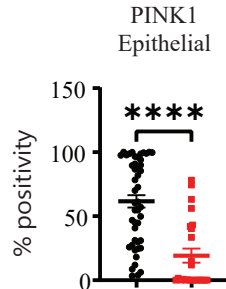

NDUFS3

Stromal

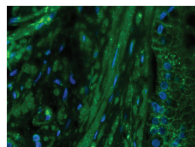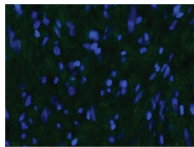

Epithelial

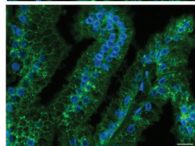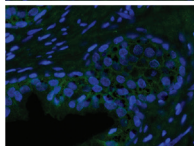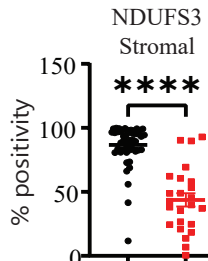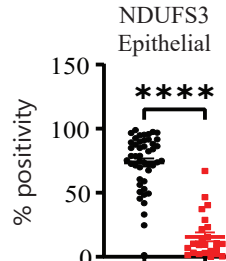

Normal

BPH

*Supplemental Figure 1: Reduced accumulation of various markers of mitochondrial function in BPH prostate.*

VDAC1/2 (brown), PINK1 (red), and NDUFS3 (green) were all measured using IHC on normal adjacent and BPH prostate tissue samples (BPT=48, BPH=24). Using the Inform software, tissues were segmented into epithelial and stroma, scored to determine a positivity threshold, and calculated as percent positive of total cells (DAPI). Images were taken at 20x magnification and zoomed 2x post-imaging. The scale bar is 10 microns (\*  $p < 0.05$ , \*\*  $p < 0.01$ , \*\*\*\*  $p < 0.0001$ ).

Supplemental Table 1

| Gene Symbol                                      | BPH vs Normal | P-Value |
|--------------------------------------------------|---------------|---------|
| <i>DDX6</i>                                      | -378.60       | 0.05    |
| <i>HLA-DRB5///HLA-DRB4///HLA-DRB3///HLA-DRB1</i> | -55.16        | 0.03    |
| <i>FBXL5</i>                                     | -28.32        | 0.03    |
| <i>ROM1</i>                                      | -26.51        | 0.03    |
| <i>SLC12A2</i>                                   | -23.55        | 0.00    |
| <i>VAT1</i>                                      | -23.55        | 0.01    |
| <i>PTPN3</i>                                     | -19.75        | 0.00    |
| <i>TM4SF1</i>                                    | -13.77        | 0.01    |
| <i>PBX3</i>                                      | -12.43        | 0.00    |
| <i>SPIN1</i>                                     | -9.36         | 0.00    |
| <i>ASNA1</i>                                     | -8.49         | 0.03    |
| <i>CDK7</i>                                      | -8.36         | 0.02    |
| <i>CHMP4B</i>                                    | -7.31         | 0.03    |
| <i>EPS8</i>                                      | -6.73         | 0.01    |
| <i>ZMYM6</i>                                     | -5.94         | 0.02    |
| <i>MLIP///PIGA</i>                               | -4.82         | 0.00    |
| <i>TNFSF12-TNFSF13///TNFSF12///TNFSF13</i>       | -4.44         | 0.03    |
| <i>PCM1</i>                                      | -4.26         | 0.00    |
| <i>PGM2</i>                                      | -3.92         | 0.01    |

| <b>Gene Symbol</b> | <b>BPH vs Normal</b> | <b>P-Value</b> |
|--------------------|----------------------|----------------|
| <i>GATAD2B</i>     | -3.79                | 0.02           |
| <i>SUSD4</i>       | -3.75                | 0.01           |
| <i>GM2A</i>        | -3.19                | 0.03           |
| <i>FLNB</i>        | -2.98                | 0.04           |
| <i>MAPK8</i>       | -2.97                | 0.05           |
| <i>AGK</i>         | -2.91                | 0.02           |
| <i>KLF6</i>        | -2.76                | 0.02           |
| <i>RHOA</i>        | -2.75                | 0.04           |
| <i>NDUFS4</i>      | -2.73                | 0.04           |
| <i>POLDIP3</i>     | -2.73                | 0.01           |
| <i>GNAS</i>        | -2.67                | 0.02           |
| <i>ZFYVE19</i>     | -2.56                | 0.02           |
| <i>SLC12A2</i>     | -2.42                | 0.00           |
| <i>WNK1</i>        | -2.37                | 0.01           |
| <i>ZMYND11</i>     | -2.35                | 0.03           |
| <i>DMXL1</i>       | -2.26                | 0.00           |
| <i>PRKARIA</i>     | -1.95                | 0.02           |
| <i>OSBPL10</i>     | -1.88                | 0.01           |
| <i>IL1R1</i>       | -1.86                | 0.00           |
| <i>EFEMP2</i>      | 1.80                 | 0.04           |
| <i>SGK1</i>        | 2.12                 | 0.04           |

| <b>Gene Symbol</b>         | <b>BPH vs Normal</b> | <b>P-Value</b> |
|----------------------------|----------------------|----------------|
| <i>ACSS3</i>               | 2.13                 | 0.01           |
| <i>HSPB8</i>               | 2.18                 | 0.03           |
| <i>ACTA2</i>               | 2.21                 | 0.04           |
| <i>TGFBR3</i>              | 2.32                 | 0.02           |
| <i>LAMB2</i>               | 2.32                 | 0.02           |
| <i>MYADM</i>               | 2.33                 | 0.01           |
| <i>MCL1//EPAS1</i>         | 2.42                 | 0.05           |
| <i>GUCY1A3</i>             | 2.44                 | 0.03           |
| <i>PTPN11</i>              | 2.44                 | 0.05           |
| <i>GSN-AS1//GSN</i>        | 2.46                 | 0.03           |
| <i>BBX</i>                 | 2.46                 | 0.04           |
| <i>MYL9</i>                | 2.52                 | 0.03           |
| <i>MBD1//HLF</i>           | 2.61                 | 0.03           |
| <i>EIF4EBP2</i>            | 2.63                 | 0.04           |
| <i>MEG3</i>                | 2.69                 | 0.00           |
| <i>MAL2</i>                | 2.70                 | 0.00           |
| <i>FNBP1L</i>              | 2.77                 | 0.04           |
| <i>PMP22</i>               | 2.82                 | 0.05           |
| <i>MSN</i>                 | 2.86                 | 0.03           |
| <i>MYADM</i>               | 2.94                 | 0.02           |
| <i>CCND2</i>               | 2.95                 | 0.01           |
| <i>LOC100129846//RBPMS</i> | 2.97                 | 0.05           |

| <b>Gene Symbol</b>        | <b>BPH vs Normal</b> | <b>P-Value</b> |
|---------------------------|----------------------|----------------|
| <i>SORBS1</i>             | 2.99                 | 0.04           |
| <i>SLMAP</i>              | 2.99                 | 0.01           |
| <i>CPQ</i>                | 3.29                 | 0.04           |
| <i>NARR//RAB34</i>        | 3.39                 | 0.00           |
| <i>C1R</i>                | 3.49                 | 0.04           |
| <i>PRELP</i>              | 3.57                 | 0.00           |
| <i>CTSL</i>               | 3.66                 | 0.03           |
| <i>FBN1</i>               | 3.67                 | 0.01           |
| <i>PKD2</i>               | 3.86                 | 0.01           |
| <i>MAPRE1</i>             | 3.91                 | 0.04           |
| <i>MAPK10</i>             | 3.96                 | 0.03           |
| <i>CDC42BPA</i>           | 4.12                 | 0.04           |
| <i>SSBP2</i>              | 4.15                 | 0.02           |
| <i>FGFR1</i>              | 4.23                 | 0.00           |
| <i>KLHL42</i>             | 4.34                 | 0.05           |
| <i>FAAH</i>               | 4.40                 | 0.04           |
| <i>IQCK</i>               | 4.42                 | 0.02           |
| <i>ENPP4</i>              | 4.43                 | 0.01           |
| <i>C9orf3//DSTN</i>       | 4.54                 | 0.03           |
| <i>COL4A2-AS1//COL4A2</i> | 4.56                 | 0.03           |
| <i>ITM2A</i>              | 4.65                 | 0.00           |
| <i>CLDN4</i>              | 4.78                 | 0.00           |

| <b>Gene Symbol</b>  | <b>BPH vs Normal</b> | <b>P-Value</b> |
|---------------------|----------------------|----------------|
| <i>FBLN1</i>        | 4.87                 | 0.00           |
| <i>GABBR1</i>       | 5.38                 | 0.01           |
| <i>PNISR</i>        | 5.39                 | 0.03           |
| <i>ADAM22</i>       | 5.47                 | 0.00           |
| <i>MAPK1</i>        | 5.98                 | 0.00           |
| <i>BBX</i>          | 6.39                 | 0.01           |
| <i>MAMLD1</i>       | 6.86                 | 0.00           |
| <i>NPTN</i>         | 7.40                 | 0.04           |
| <i>RAB11FIP2</i>    | 8.12                 | 0.02           |
| <i>TSPAN3</i>       | 8.46                 | 0.04           |
| <i>VIM</i>          | 8.76                 | 0.01           |
| <i>COL3A1</i>       | 9.46                 | 0.02           |
| <i>PIAS1</i>        | 9.64                 | 0.01           |
| <i>ALCAM</i>        | 9.72                 | 0.00           |
| <i>RSU1///ABCD3</i> | 9.97                 | 0.00           |
| <i>SLC39A6</i>      | 11.37                | 0.01           |
| <i>TST</i>          | 11.59                | 0.00           |
| <i>PLOD3</i>        | 11.69                | 0.01           |
| <i>YAPI</i>         | 11.74                | 0.00           |
| <i>PLGLA///PLG</i>  | 15.53                | 0.02           |
| <i>LDB2</i>         | 16.68                | 0.02           |
| <i>CRTC3</i>        | 21.77                | 0.02           |

| Gene Symbol                | BPH vs Normal | P-Value |
|----------------------------|---------------|---------|
| <i>PEA15</i>               | 21.92         | 0.04    |
| <i>BPTF</i>                | 24.74         | 0.02    |
| <i>IL10RA</i>              | 25.30         | 0.03    |
| <i>NEDD4L</i>              | 25.49         | 0.01    |
| <i>SEPP1</i>               | 29.61         | 0.00    |
| <i>CCDC80</i>              | 66.25         | 0.01    |
| <i>ARPC4-TTLL3///ARPC4</i> | 98.33         | 0.03    |
| <i>SRSF3</i>               | 169.61        | 0.05    |

**Supplemental Table 2**

|        |   |                         |
|--------|---|-------------------------|
| YWHAZ  | F | TGATCCCCAATGCTTCACAAG   |
|        | R | GCCAAGGTAACGGTAGTAATCT  |
| TBP    | F | CCACTCACAGACTCTCACAAC   |
|        | R | CTGCGGTACAATCCCAGAACT   |
| COL1A1 | F | GAGGGCCAAGACGAAGACATC   |
|        | R | CAGATCACGTCATCGCACAAC   |
| COL3A1 | F | GCCAAATATGTGTCTGTGACTCA |
|        | R | GGGCGAGTAGGAGCAGCAGTTG  |
